# Supplementary material for: Impact of Maternal Obesity on the Gestational Metabolome and Infant Metabolome, Brain, and Behavioral Development in Rhesus Macaques
Source: MDPI journal article supplement (doi:10.3390/metabo12080764), 2022-08-19
Supplement: s1 [file s1]

## Supplementary Materials

### **Impact of Maternal Obesity on the Gestational Metabolome and Infant Metabolome, Brain, and Behavioral Development in Rhesus Macaques**

Yu Hasegawa, Zhichao Zhang, Ameer Y. Taha, John P. Capitanio, Melissa D. Bauman, Mari S. Golub, Judy Van de Water, Catherine A. VandeVoort, Cheryl K. Walker, Carolyn M. Slupsky

- **Supplementary Figures:**

- Supplementary Figure S1. Maternal plasma cytokine levels illustrating no significant group differences.
- Supplementary Figure S2. Infant plasma cytokine levels show no significant group differences.
- Supplementary Figure S3. The representative Western blotting raw images.
- Supplementary Figure S4. Activity of mTOR proteins in amygdala, hippocampus, and hypothalamus (mean  $\pm$  SE) of infants born to mothers in the Obese group vs Lean group.

- **Supplementary Tables:**

- Supplementary Table S1. Summary of biological samples used in this study.
- Supplementary Table S2. Summary of sample size used in the analyses.
- Supplementary Table S3. Summary of coefficient of variation (%) of HOMA-IR.

- Supplementary Table S4. Mean concentrations of metabolites in maternal plasma ( $\mu\text{M}$ ).
- Supplementary Table S5. Mean concentrations of metabolites in maternal urine ( $\mu\text{M}$ ).
- Supplementary Table S6. Mean concentrations of metabolites in placenta ( $\text{nmol/g}$ ).
- Supplementary Table S7. Metabolic status of the two Obese mothers who showed high HOMA-IR and large birthweight of infants in Figure 4b.
- Supplementary Table S8. Mean concentrations of metabolites in infant plasma ( $\mu\text{M}$ ).
- Supplementary Table S9. Mean concentrations of metabolites in infant urine ( $\mu\text{M}$ ).

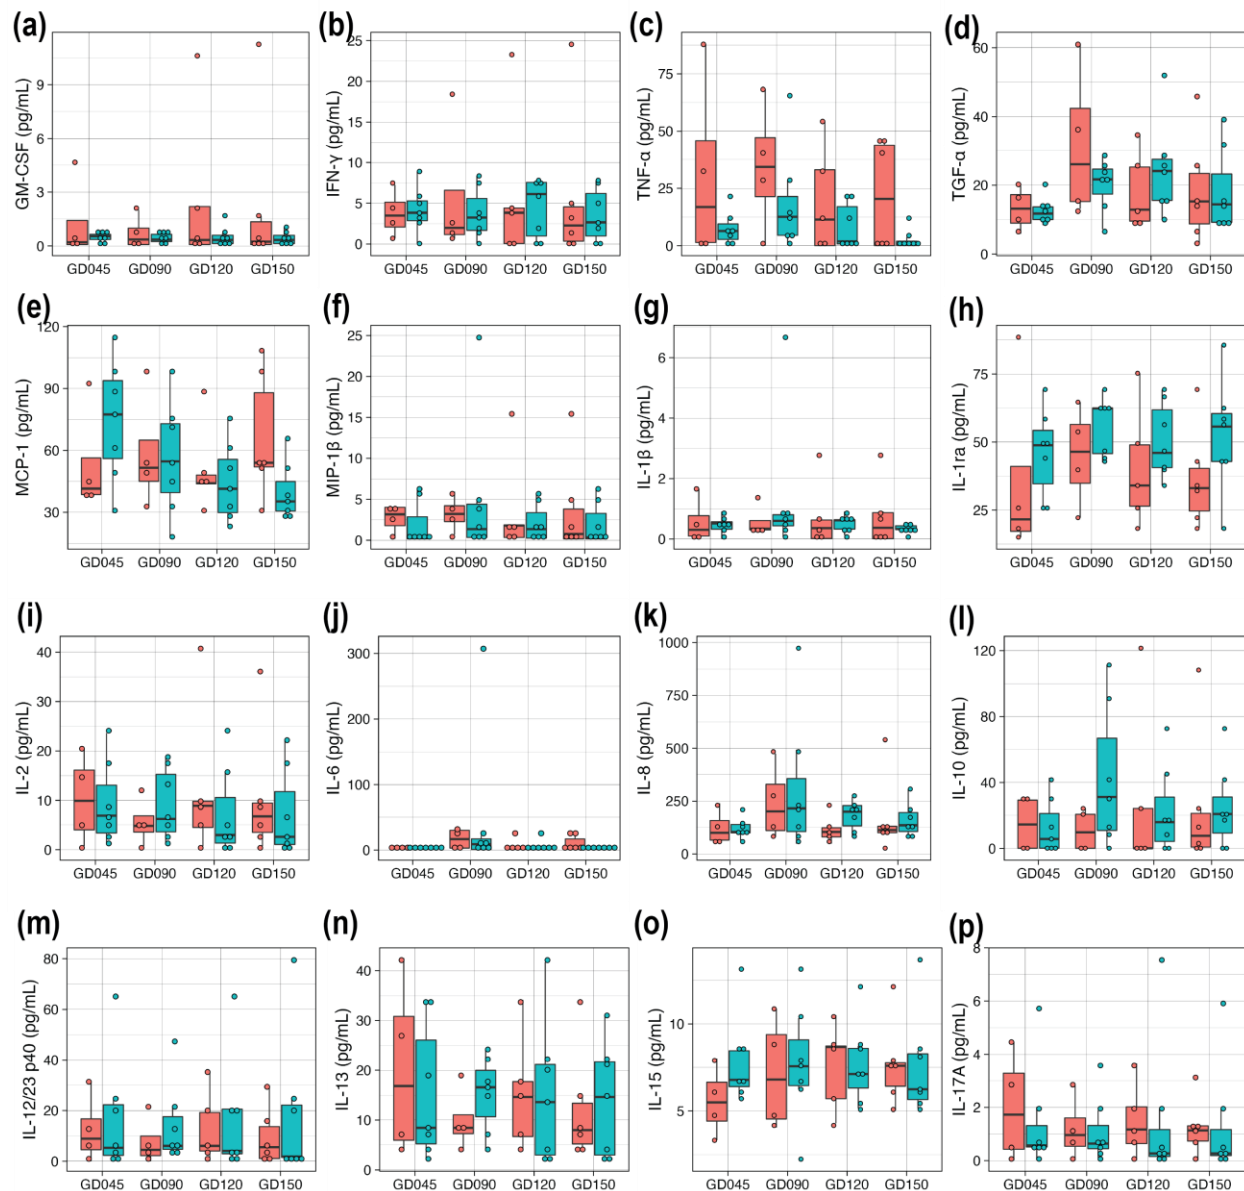

**Supplementary Figure S1.** Maternal plasma cytokine levels illustrating no significant group differences. Bar plots represent (a) GM-CSF, (b) IFN- $\gamma$ , (c) TNF- $\alpha$ , (d) TGF- $\alpha$ , (e) MCP-1, (f) MIP-1 $\beta$ , (g) IL-1 $\beta$ , (h) IL-1ra, (i) IL-2, (j) IL-6, (k) IL-8, (l) IL-10, (m) IL-12/23 p40, (n) IL-13, (o) IL-15, and (p) IL-17A. Each dot represents data from an individual animal. Top and bottom of the boxes represent the 25th and 75th percentiles respectively; the middle line represents the median; and the top and bottom whiskers represent maximum and minimum values. Points outside of the whiskers represent outliers. The red and blue correspond to the Lean and Obese groups respectively.

Abbreviations: GM-CSF, granulocyte-macrophage colony-stimulating factor; IFN- $\gamma$ , interferon  $\gamma$ ; TNF- $\alpha$ , tumor necrosis factor- $\alpha$ ; TGF- $\alpha$ , transforming growth factor- $\alpha$ ; MCP-1, monocyte chemoattractant protein-1; MIP-1 $\beta$ , macrophage inflammatory protein-1 $\beta$ ; IL, interleukin.

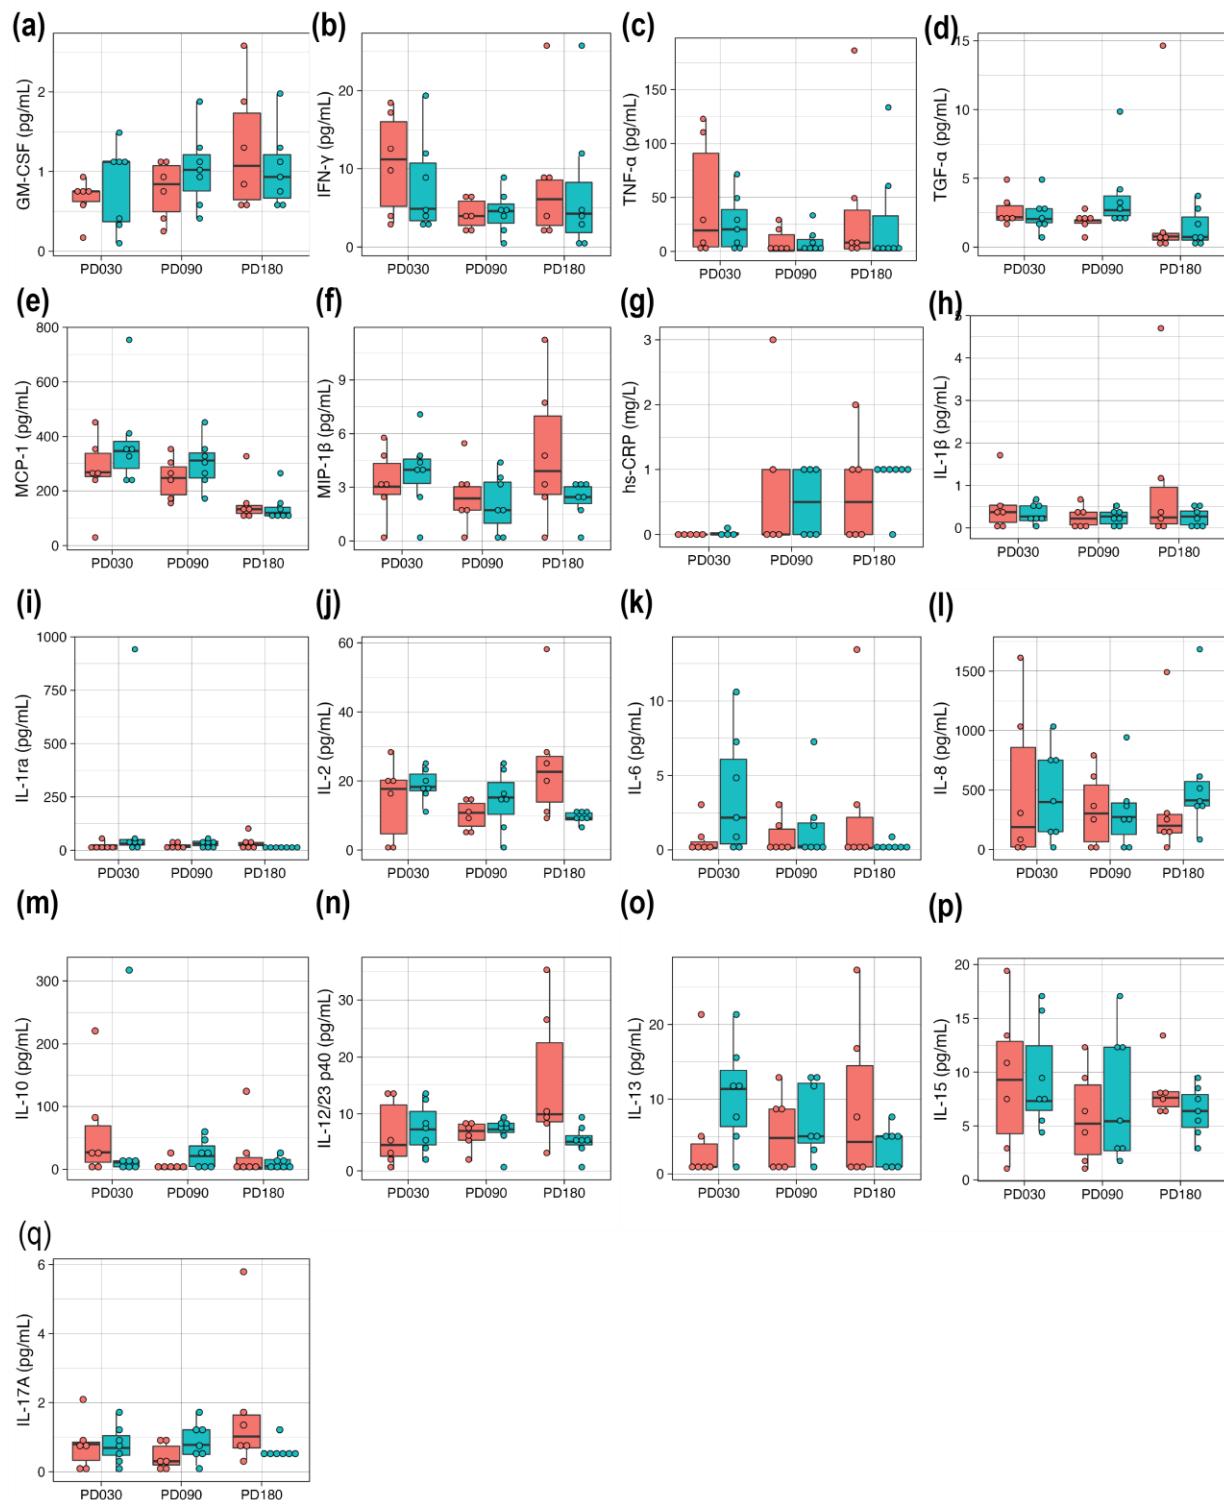

**Supplementary Figure S2.** Infant plasma cytokine levels show no significant group differences. Bar plots represent (a) GM-CSF, (b) IFN- $\gamma$ , (c) TNF- $\alpha$ , (d) TGF- $\alpha$ , (e) MCP-1, (f) MIP-1 $\beta$ , (g) hs-CRP, (h) IL-1 $\beta$ , (i) IL-1ra, (j) IL-2, (k) IL-6, (l) IL-8, (m) IL-10, (n) IL-12/23 p40, (o) IL-13, (p) IL-15, and (q) IL-17A. Each dot represents data from an individual animal. Top and bottom of the

boxes represent the 25th and 75th percentiles respectively; the middle line represents the median; and the top and bottom whiskers represent maximum and minimum values. Points outside of the whiskers represent outliers. The red and blue correspond to the Lean and Obese groups respectively.

Abbreviations: GM-CSF, granulocyte-macrophage colony-stimulating factor; IFN-  $\gamma$ , interferon  $\gamma$ ; TNF- $\alpha$ , tumor necrosis factor- $\alpha$ ; TGF- $\alpha$ , transforming growth factor- $\alpha$ ; MCP-1, monocyte chemoattractant protein-1; MIP-1 $\beta$ , macrophage inflammatory protein-1 $\beta$ ; hs-CRP, high-sensitivity C-reactive protein; IL, interleukin.

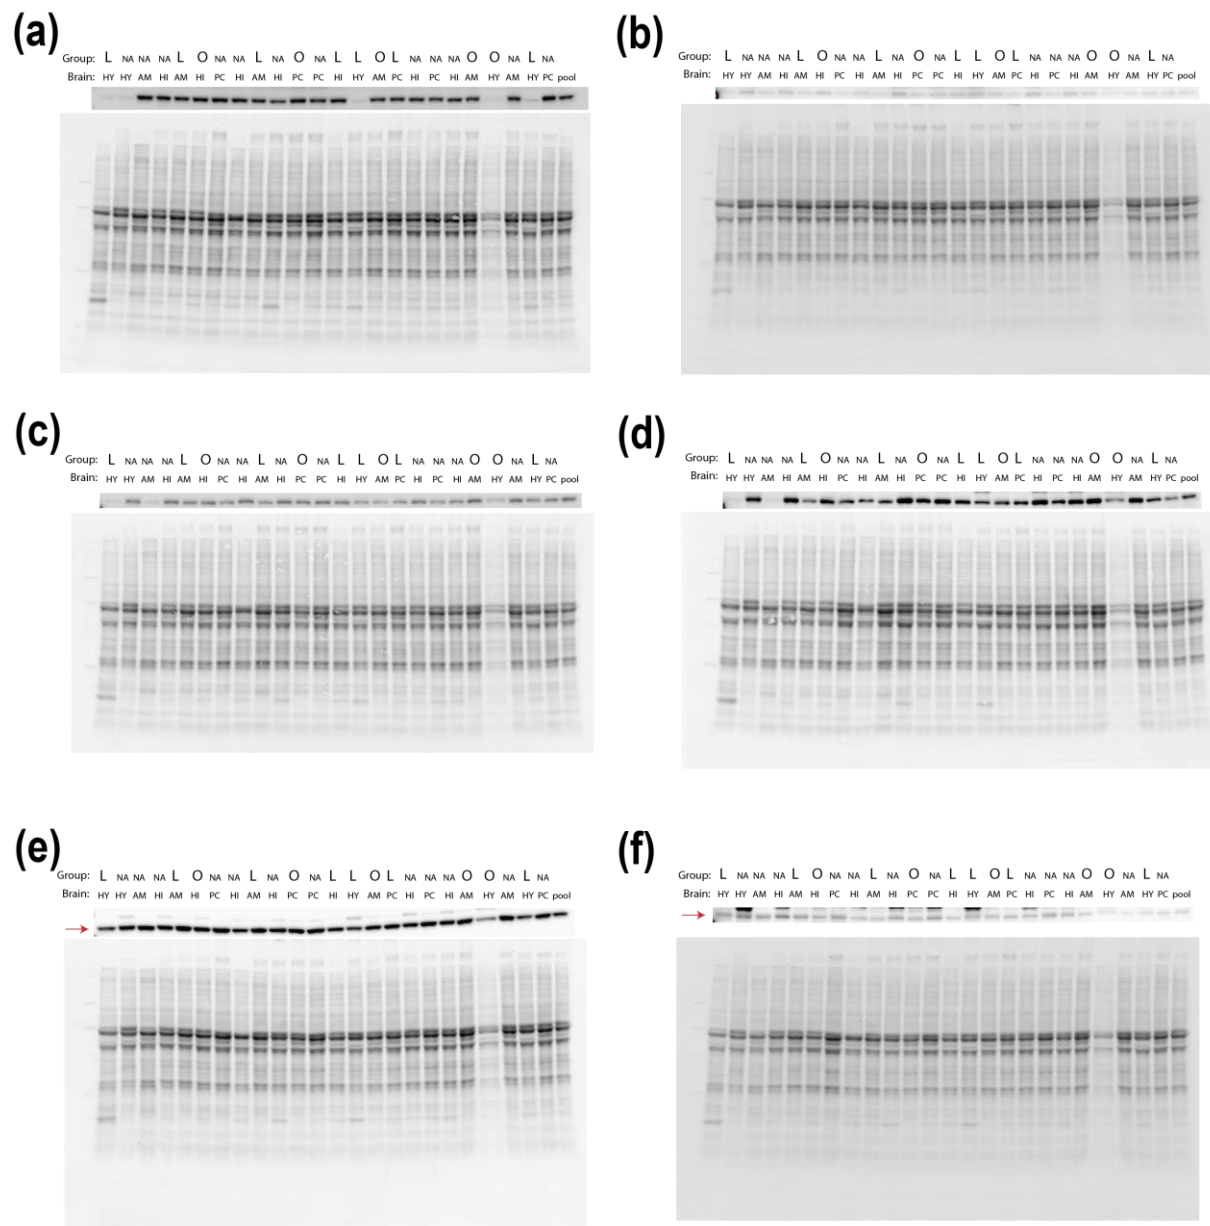

**Supplementary Figure S3.** Representative Western blot raw images. The band image (above) and the stain-free image showing the total protein (below) are shown for (a) total Akt, (b) p-Akt, (c) total AMPK, (d) p-AMPK, (e) total p70-S6K, and (f) p-p70-S6K. The samples from all 4 brain regions were randomized and run with the pooled sample (indicated “pool” in the image) used to normalize between different runs. Samples from different regions of brain were noted with the abbreviation of the brain regions (AM, amygdala; HI, hippocampus; HY, hypothalamus; PC, prefrontal cortex). The samples from Lean group are indicated as “L” and those from Obese group are indicated with “O”, and those that were not used in this study are indicated with “NA”.

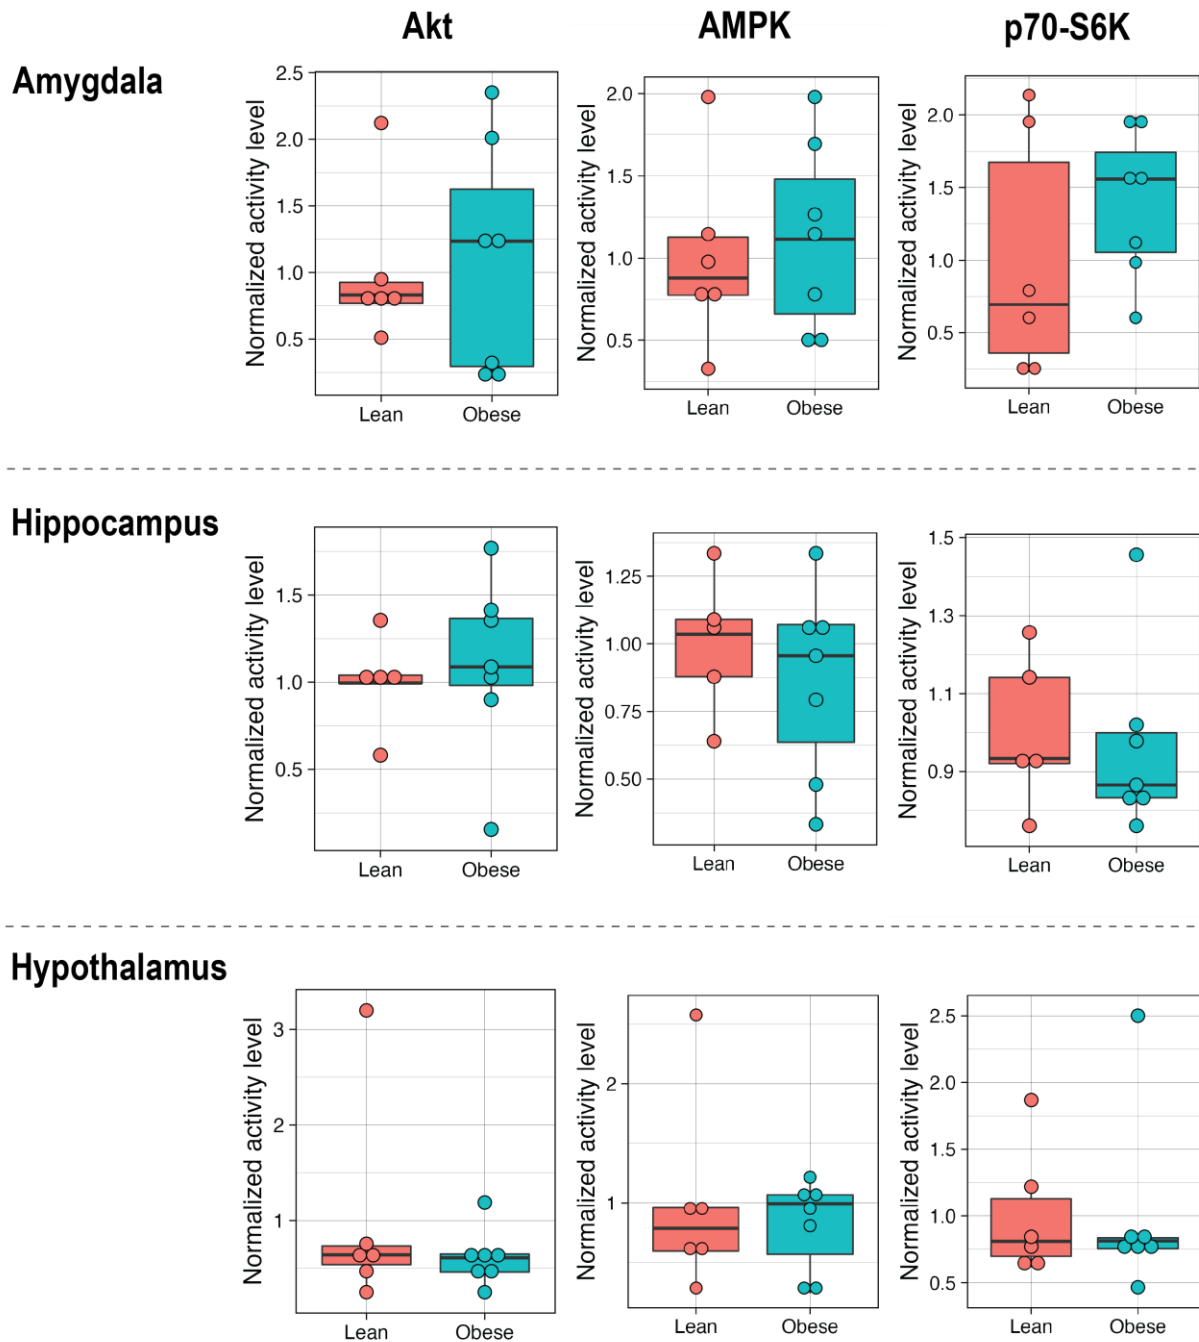

**Supplementary Figure S4.** Activity of mTOR proteins in amygdala, hippocampus, and hypothalamus of infants born to mothers in the Obese group vs Lean group. The red and blue bars correspond to infants of mothers in the Lean and Obese groups respectively. Each dot represents data from an individual animal. Top and bottom of the boxes represent the 25th and 75th percentiles respectively; the middle line represents the median; and the top and bottom whiskers represent maximum and minimum values. Points outside of the whiskers represent outliers. Sample size: Lean=6 for amygdala and hypothalamus, and n=5 for hippocampus; Obese=7 for all brain regions.

**Supplementary Table S1.** Summary of biological sample used in this study. Maternal samples were collected at gestational day (GD) 45, 90, 120, and 150. Placental samples were collected at GD150. Infant samples were collected at postnatal day (PD) 30, 90, 110, and 180. The sample size of the biological samples was not balanced due to fetal deaths for unknown reasons, misidentification of female offspring, technical issues in collecting enough sample volume for analysis, or recruitment of additional animals into the study in the middle of pregnancy to account for the sample loss.

|       | Mother ID | Infant ID | Foster Mother ID | Mode of delivery | Gestational length (days) | Maternal sample |      |       |       |       |      |       |       | Infant sample |        |      |       |       |       |          |             |              |                    |
|-------|-----------|-----------|------------------|------------------|---------------------------|-----------------|------|-------|-------|-------|------|-------|-------|---------------|--------|------|-------|-------|-------|----------|-------------|--------------|--------------------|
|       |           |           |                  |                  |                           | Plasma          |      |       |       | Urine |      |       |       | Placenta      | Plasma |      |       |       | Urine | Amygdala | Hippocampus | Hypothalamus | Pre-frontal cortex |
|       |           |           |                  |                  |                           | GD45            | GD90 | GD120 | GD150 | GD45  | GD90 | GD120 | GD150 | GD150         | PD30   | PD90 | PD110 | PD180 | PD180 | PD180    | PD180       | PD180        | PD180              |
| Lean  | 1146126   | NA        | NA               | NA               | NA                        | X               | X    | X     |       | X     | X    | X     |       |               |        |      |       |       |       |          |             |              |                    |
|       | 1147111   | 3147111   | NA               | Vaginal          | 157                       |                 |      |       | X     |       |      |       | X     |               | X      | X    | X     | X     | X     | X        | X           | X            | X                  |
|       | 1145122   | 3145122   | NA               | Vaginal          | 163                       | X               | X    | X     | X     | X     | X    | X     |       | X             | X      | X    | X     | X     | X     | X        |             | X            | X                  |
|       | 1142120   | NA        | NA               | NA               | NA                        | X               |      |       |       | X     |      |       |       |               |        |      |       |       |       |          |             |              |                    |
|       | 1141109   | NA        | NA               | Vaginal          | NA                        | X               | X    | X     | X     | X     | X    | X     | X     |               |        |      |       |       |       |          |             |              |                    |
|       | 1144110   | 3144110   | NA               | Vaginal          | 165                       |                 |      | X     | X     |       |      | X     | X     |               | X      | X    | X     | X     | X     | X        | X           | X            | X                  |
|       | 1143103   | NA        | NA               | NA               | NA                        | X               | X    |       |       | X     | X    |       |       |               |        |      |       |       |       |          |             |              |                    |
|       | 1242201   | 3242201   | NA               | Vaginal          | 167                       | X               | X    | X     | X     | X     | X    | X     | X     | X             | X      | X    | X     | X     | X     | X        | X           | X            | X                  |
|       | 1241217   | 3241217   | 2241217          | C-section        | 150                       | X               | X    | X     | X     | X     | X    | X     | X     |               | X      | X    | X     | X     | X     | X        | X           | X            | X                  |
|       | 1243225   | 3243225   | 2243225          | C-section        | 165                       | X               | X    | X     | X     | X     | X    | X     |       |               | X      | X    | X     | X     | X     | X        | X           | X            | X                  |
|       | 1244124   | NA        | NA               | Vaginal          | NA                        | X               | X    | X     | X     | X     | X    | X     |       |               |        |      |       |       |       |          |             |              |                    |
| Obese | 1113127   | NA        | NA               | NA               | NA                        |                 | X    | X     | X     |       | X    | X     | X     |               |        |      |       |       |       |          |             |              |                    |
|       | 1111101   | NA        | NA               | Vaginal          | NA                        | X               | X    | X     | X     |       | X    | X     | X     |               |        |      |       |       |       |          |             |              |                    |
|       | 1114102   | 3114102   | NA               | Vaginal          | 176                       | X               | X    | X     | X     | X     | X    | X     | X     |               | X      | X    | X     | X     | X     | X        | X           | X            | X                  |
|       | 1115104   | NA        | NA               | NA               | NA                        | X               | X    | X     | X     | X     | X    | X     |       | X             |        |      |       |       |       |          |             |              |                    |
|       | 1112102   | 3112102   | NA               | Vaginal          | 170                       | X               | X    | X     | X     | X     | X    | X     | X     |               | X      | X    | X     | X     | X     | X        | X           | X            | X                  |
|       | 1212115   | 3212115   | NA               | Vaginal          | 168                       | X               | X    | X     | X     | X     | X    | X     | X     |               | X      | X    | X     | X     | X     | X        | X           | X            | X                  |
|       | 1213116   | NA        | NA               | NA               | NA                        | X               | X    | X     | X     | X     | X    | X     | X     | X             |        |      |       |       |       |          |             |              |                    |
|       | 1216119   | 3216119   | NA               | Vaginal          | 158                       | X               | X    | X     | X     | X     | X    | X     | X     |               | X      | X    | X     | X     | X     | X        | X           | X            | X                  |
|       | 1214217   | 3214217   | 2214217          | C-section        | 162                       | X               | X    | X     | X     | X     | X    | X     | X     | X             | X      | X    | X     | X     | X     | X        | X           | X            | X                  |
|       | 1215218   | 3215218   | 2215218          | C-section        | 167                       | X               | X    | X     | X     | X     | X    | X     | X     |               | X      | X    | X     | X     | X     | X        | X           | X            | X                  |
|       | 1211112   | 3211112   | NA               | Vaginal          | 161                       | X               | X    | X     | X     | X     | X    | X     | X     | X             | X      | X    | X     | X     | X     | X        | X           | X            | X                  |



**Supplementary Table S2.** Summary of sample size used in the analyses.

|                      | Mother |       |      |       |       |       |       |       | Infant |       |      |       |       |       |       |       |
|----------------------|--------|-------|------|-------|-------|-------|-------|-------|--------|-------|------|-------|-------|-------|-------|-------|
|                      | GD45   |       | GD90 |       | GD120 |       | GD150 |       | PD30   |       | PD90 |       | PD110 |       | PD180 |       |
|                      | Lean   | Obese | Lean | Obese | Lean  | Obese | Lean  | Obese | Lean   | Obese | Lean | Obese | Lean  | Obese | Lean  | Obese |
| Plasma               | 4      | 7     | 4    | 7     | 5     | 7     | 6     | 7     | 6      | 7     | 6    | 7     | 6     | 7     | 6     | 7     |
| Urine                | 4      | 7     | 4    | 7     | 5     | 7     | 4     | 7     |        |       |      |       |       |       | 6     | 7     |
| Placenta             |        |       |      |       |       |       | 2     | 4     |        |       |      |       |       |       |       |       |
| Amygdala             |        |       |      |       |       |       |       |       |        |       |      |       |       |       | 6     | 7     |
| Hippo-<br>campus     |        |       |      |       |       |       |       |       |        |       |      |       |       |       | 5     | 7     |
| Prefrontal<br>cortex |        |       |      |       |       |       |       |       |        |       |      |       |       |       | 6     | 7     |
| Hypo-<br>thalamus    |        |       |      |       |       |       |       |       |        |       |      |       |       |       | 6     | 7     |

**Supplementary Table S3.** Summary of coefficient of variation (%) of HOMA-IR.

| <b>Group</b> | <b>GD45</b> | <b>GD90</b> | <b>GD120</b> | <b>GD150</b> |
|--------------|-------------|-------------|--------------|--------------|
| Lean         | 61          | 76          | 44           | 78           |
| Obese        | 56          | 100         | 123          | 106          |

**Supplementary Table S4.** Mean concentrations of metabolites in maternal plasma (μM). FDR correction was applied on p-values of metabolites involved in TCA cycle or one-carbon metabolism pathway. Concentrations are expressed as mean and standard deviation (SD). Effect size was calculated for metabolites with FDR corrected  $p < 0.1$ .

|                      | LC    |      |       |       |       |      |       |      | OC    |       |       |      |       |      |       |      | p-value<br>(adjusted p-value) | Effect size<br>(R2) |
|----------------------|-------|------|-------|-------|-------|------|-------|------|-------|-------|-------|------|-------|------|-------|------|-------------------------------|---------------------|
|                      | GD45  |      | GD90  |       | GD120 |      | GD150 |      | GD45  |       | GD90  |      | GD120 |      | GD150 |      |                               |                     |
|                      | Mean  | SD   | Mean  | SD    | Mean  | SD   | Mean  | SD   | Mean  | SD    | Mean  | SD   | Mean  | SD   | Mean  | SD   |                               |                     |
| 2-Hydroxybutyrate    | 12.1  | 6.0  | 13.3  | 6.6   | 9.8   | 4.8  | 11.2  | 4.2  | 17.9  | 11.3  | 8.5   | 4.8  | 10.1  | 4.0  | 9.5   | 6.2  | 0.71                          |                     |
| 2-Hydroxyisovalerate | 4.0   | 1.2  | 3.1   | 1.3   | 3.7   | 1.3  | 3.8   | 1.0  | 6.6   | 5.1   | 3.5   | 1.3  | 4.2   | 2.1  | 4.6   | 2.7  | 0.44                          |                     |
| 2-Oxoglutarate       | 9.6   | 0.8  | 6.5   | 1.0   | 7.9   | 1.5  | 8.3   | 1.3  | 11.4  | 1.8   | 9.4   | 3.6  | 10.3  | 2.3  | 10.2  | 3.2  | 0.085<br>(0.085)              | 0.23<br>(medium)    |
| 2-Oxoisocaproate     | 9.9   | 3.0  | 7.2   | 1.8   | 8.1   | 2.7  | 7.1   | 1.8  | 8.2   | 1.0   | 7.3   | 1.9  | 7.6   | 1.9  | 6.7   | 1.1  | 0.90                          |                     |
| 3-Hydroxybutyrate    | 92.8  | 41.2 | 176.8 | 115.0 | 79.5  | 43.7 | 53.2  | 22.5 | 161.5 | 166.2 | 91.8  | 73.6 | 68.2  | 34.5 | 67.8  | 67.7 | 0.74                          |                     |
| 3-Hydroxyisobutyrate | 26.5  | 4.5  | 27.5  | 6.3   | 26.1  | 3.7  | 22.2  | 3.9  | 20.4  | 2.2   | 20.9  | 3.7  | 20.6  | 3.3  | 20.1  | 2.8  | 0.013                         |                     |
| 3-Methylhistidine    | 39.2  | 11.7 | 44.9  | 6.6   | 53.3  | 14.5 | 56.7  | 15.1 | 38.0  | 10.7  | 65.2  | 8.4  | 68.2  | 7.0  | 72.3  | 6.6  | 0.035                         |                     |
| Acetate              | 68.7  | 21.5 | 105.9 | 26.6  | 96.8  | 25.3 | 112.1 | 50.8 | 115.6 | 64.2  | 128.8 | 62.2 | 89.8  | 44.1 | 112.3 | 43.9 | 0.59                          |                     |
| Acetoacetate         | 58.2  | 27.5 | 122.0 | 69.7  | 50.4  | 30.7 | 44.9  | 13.5 | 120.0 | 126.3 | 67.1  | 47.6 | 45.5  | 18.7 | 59.7  | 57.2 | 0.94                          |                     |
| Acetone              | 13.9  | 4.5  | 17.1  | 9.8   | 12.0  | 4.9  | 12.2  | 3.0  | 20.8  | 17.7  | 12.1  | 6.5  | 11.7  | 5.8  | 16.1  | 19.1 | 0.74                          |                     |
| Alanine              | 221.5 | 25.0 | 146.2 | 55.8  | 176.5 | 44.1 | 167.6 | 10.2 | 218.2 | 34.2  | 182.1 | 19.1 | 192.5 | 44.9 | 183.4 | 9.2  | 0.10                          |                     |
| Arginine             | 51.3  | 16.1 | 42.4  | 1.2   | 43.4  | 11.7 | 42.5  | 10.2 | 55.1  | 5.3   | 48.5  | 12.1 | 47.3  | 8.9  | 45.7  | 9.5  | 0.21                          |                     |
| Asparagine           | 32.0  | 5.5  | 18.5  | 4.5   | 25.4  | 3.0  | 24.9  | 3.8  | 27.4  | 3.1   | 26.6  | 6.4  | 26.2  | 4.2  | 25.9  | 3.6  | 0.33                          |                     |
| Betaine              | 66.2  | 24.7 | 145.7 | 63.3  | 154.6 | 67.1 | 162.4 | 64.6 | 68.1  | 16.6  | 100.9 | 49.6 | 126.4 | 56.8 | 153.9 | 76.2 | 0.53 (0.79)                   |                     |
| Butyrate             | 7.2   | 2.4  | 6.2   | 1.0   | 6.1   | 2.0  | 6.1   | 1.1  | 6.8   | 1.0   | 5.9   | 1.1  | 5.6   | 1.4  | 5.2   | 1.2  | 0.38                          |                     |
| Carnitine            | 28.5  | 7.1  | 26.0  | 14.1  | 25.8  | 6.1  | 22.7  | 7.7  | 22.8  | 9.2   | 22.1  | 6.1  | 23.6  | 4.6  | 21.3  | 7.8  | 0.56                          |                     |
| Choline              | 8.9   | 6.7  | 5.5   | 1.7   | 5.2   | 1.5  | 6.7   | 4.7  | 6.2   | 4.1   | 8.4   | 6.1  | 7.2   | 5.8  | 5.8   | 1.3  | 0.82 (0.82)                   |                     |
| Creatine             | 77.2  | 21.7 | 55.2  | 18.0  | 57.3  | 5.8  | 56.6  | 11.2 | 45.5  | 18.8  | 60.5  | 12.5 | 62.1  | 16.0 | 62.1  | 24.8 | 0.55                          |                     |
| Creatinine           | 50.7  | 6.6  | 49.7  | 8.8   | 53.0  | 14.2 | 47.9  | 9.5  | 50.2  | 6.0   | 48.5  | 4.0  | 51.0  | 5.2  | 50.1  | 2.6  | 0.62                          |                     |
| Ethanol              | 23.1  | 14.3 | 19.5  | 20.9  | 32.1  | 25.0 | 61.2  | 85.6 | 34.1  | 29.6  | 23.3  | 15.5 | 15.6  | 11.3 | 18.7  | 5.8  | 0.64                          |                     |
| Formate              | 106.3 | 7.2  | 99.3  | 18.8  | 91.8  | 14.5 | 112.1 | 16.3 | 92.6  | 21.5  | 113.1 | 18.9 | 114.8 | 21.6 | 119.5 | 22.5 | 0.54                          |                     |

|                     |        |        |        |        |        |        |        |       |        |        |        |       |        |        |        |       |                    |                  |
|---------------------|--------|--------|--------|--------|--------|--------|--------|-------|--------|--------|--------|-------|--------|--------|--------|-------|--------------------|------------------|
| Glucose             | 3592.5 | 336.4  | 3388.5 | 561.7  | 3665.3 | 1176.8 | 3260.9 | 451.4 | 4504.3 | 1648.4 | 3277.3 | 242.2 | 3692.1 | 1005.5 | 3488.7 | 290.1 | 0.32               |                  |
| Glutamate           | 31.5   | 10.0   | 46.5   | 16.9   | 31.1   | 11.3   | 36.2   | 14.8  | 49.4   | 26.2   | 46.6   | 16.2  | 32.3   | 9.1    | 39.5   | 9.0   | 0.41               |                  |
| Glutamine           | 331.0  | 40.4   | 266.5  | 19.9   | 311.1  | 36.1   | 324.7  | 37.0  | 370.4  | 36.7   | 329.1  | 22.8  | 319.6  | 49.1   | 328.3  | 26.2  | 0.11               |                  |
| Glycerol            | 559.7  | 75.4   | 452.3  | 35.0   | 500.2  | 60.9   | 542.0  | 128.8 | 550.2  | 83.0   | 497.0  | 129.4 | 519.4  | 115.2  | 573.7  | 93.7  | 0.43               |                  |
| Glycine             | 253.1  | 43.1   | 221.5  | 38.0   | 217.3  | 14.1   | 210.0  | 17.0  | 283.9  | 44.4   | 239.7  | 28.8  | 232.3  | 29.0   | 227.2  | 20.1  | 0.12               |                  |
| Histidine           | 64.0   | 10.3   | 56.4   | 12.8   | 59.4   | 9.5    | 59.5   | 9.8   | 70.7   | 8.5    | 79.9   | 11.2  | 73.5   | 15.5   | 74.3   | 9.4   | 0.0020<br>(0.0082) | 0.49 (large)     |
| Isoleucine          | 79.1   | 10.0   | 67.6   | 8.6    | 58.3   | 10.8   | 55.9   | 9.3   | 75.9   | 10.8   | 65.6   | 8.5   | 62.0   | 9.5    | 57.9   | 5.3   | 0.53               |                  |
| Lactate             | 2944.5 | 2138.3 | 1832.9 | 1840.2 | 2719.3 | 2104.5 | 1740.6 | 660.3 | 1607.5 | 639.7  | 1401.8 | 502.6 | 2054.4 | 1417.0 | 1479.2 | 447.4 | 0.58               |                  |
| Leucine             | 95.8   | 13.6   | 83.8   | 18.0   | 77.2   | 15.6   | 70.1   | 13.4  | 90.9   | 11.9   | 84.2   | 11.4  | 78.8   | 15.7   | 77.0   | 8.5   | 0.38               |                  |
| Lysine              | 126.9  | 11.5   | 110.7  | 10.3   | 123.4  | 13.3   | 120.2  | 20.3  | 144.5  | 19.1   | 142.8  | 21.3  | 140.5  | 14.7   | 143.8  | 29.3  | 0.010<br>(0.026)   | 0.39 (large)     |
| Methionine          | 25.9   | 3.4    | 16.3   | 2.7    | 17.1   | 1.6    | 14.8   | 2.1   | 22.3   | 3.6    | 17.8   | 2.9   | 17.1   | 3.0    | 16.0   | 3.7   | 0.92               |                  |
| myo-Inositol        | 24.4   | 8.9    | 22.1   | 3.8    | 29.7   | 7.7    | 27.4   | 2.6   | 21.1   | 4.1    | 27.3   | 3.6   | 30.6   | 6.8    | 28.0   | 2.1   | 0.53               |                  |
| N,N-Dimethylglycine | 2.9    | 0.8    | 3.6    | 1.4    | 3.3    | 0.4    | 4.0    | 0.9   | 2.0    | 0.9    | 2.6    | 1.7   | 2.7    | 0.8    | 3.4    | 1.6   | 0.0020<br>(0.0049) | 0.50 (large)     |
| O-Acetylcarnitine   | 10.7   | 4.9    | 10.8   | 4.6    | 8.1    | 2.8    | 6.3    | 2.1   | 8.1    | 3.2    | 6.8    | 4.6   | 7.1    | 2.3    | 6.5    | 4.7   | 0.34               |                  |
| Phenylalanine       | 46.1   | 4.4    | 35.1   | 2.7    | 37.4   | 2.2    | 35.8   | 5.9   | 42.0   | 5.0    | 39.8   | 4.7   | 39.6   | 6.6    | 37.6   | 4.7   | 0.41               |                  |
| Proline             | 105.7  | 6.3    | 111.9  | 22.7   | 127.0  | 37.0   | 118.4  | 22.5  | 132.3  | 19.6   | 147.3  | 25.3  | 131.2  | 44.8   | 135.9  | 22.4  | 0.040<br>(0.050)   | 0.29<br>(medium) |
| Pyruvate            | 192.9  | 80.8   | 140.5  | 112.8  | 163.2  | 90.0   | 142.5  | 48.8  | 136.6  | 54.8   | 129.6  | 40.4  | 159.3  | 72.8   | 130.8  | 36.4  | 1.00               |                  |
| Serine              | 102.9  | 18.5   | 97.3   | 34.9   | 100.3  | 25.3   | 96.9   | 16.6  | 107.8  | 14.4   | 96.2   | 14.2  | 91.4   | 11.3   | 87.4   | 9.8   | 0.38               |                  |
| Succinate           | 2.7    | 0.7    | 1.9    | 0.3    | 2.7    | 1.0    | 2.5    | 0.7   | 3.2    | 0.8    | 2.8    | 0.8   | 3.2    | 0.7    | 2.8    | 0.7   | 0.040<br>(0.050)   | 0.29<br>(medium) |
| Taurine             | 105.3  | 34.4   | 80.4   | 13.3   | 94.0   | 17.5   | 83.8   | 25.3  | 79.8   | 15.0   | 83.1   | 14.1  | 91.1   | 17.0   | 89.6   | 11.9  | 0.97               |                  |
| Threonine           | 83.2   | 12.0   | 62.9   | 16.9   | 69.7   | 9.9    | 67.0   | 7.3   | 70.5   | 7.3    | 67.9   | 11.8  | 70.4   | 10.1   | 74.7   | 8.1   | 0.63               |                  |
| Tyrosine            | 61.7   | 12.0   | 46.3   | 8.9    | 52.0   | 10.1   | 50.7   | 10.5  | 49.5   | 7.1    | 41.5   | 8.1   | 43.5   | 6.7    | 46.7   | 6.3   | 0.070              |                  |
| Urea                | 2722.0 | 681.7  | 3046.6 | 914.4  | 3003.9 | 803.9  | 2787.4 | 539.9 | 2217.9 | 505.4  | 2500.8 | 685.6 | 2580.8 | 536.9  | 2726.2 | 601.1 | 0.45               |                  |
| Uridine             | 7.6    | 1.6    | 9.5    | 1.4    | 7.7    | 1.2    | 8.2    | 1.0   | 5.8    | 1.3    | 6.6    | 0.5   | 6.9    | 1.2    | 6.5    | 1.1   | <0.001             |                  |
| Valine              | 216.4  | 27.8   | 179.0  | 29.3   | 162.5  | 26.3   | 150.6  | 21.6  | 201.4  | 26.2   | 176.6  | 28.3  | 164.0  | 32.1   | 158.5  | 14.7  | 0.71               |                  |

**Supplementary Table S5.** Mean concentrations of metabolites in maternal urine ( $\mu\text{M}$ ). FDR correction was applied on p-values of metabolites involved in TCA cycle or one-carbon metabolism pathway. Concentrations are expressed as mean and standard deviation (SD). Effect size was calculated for metabolites with FDR corrected p-values less than 0.1. Concentrations are expressed as mean and standard deviation (SD). Effect size was calculated for metabolites with FDR corrected  $p < 0.1$ .

|                             | LC   |      |      |     |       |      |       |      | OC   |      |      |      |       |      |       |     | p-value<br>(adjusted<br>p-value) | Effect size<br>(R2) |
|-----------------------------|------|------|------|-----|-------|------|-------|------|------|------|------|------|-------|------|-------|-----|----------------------------------|---------------------|
|                             | GD45 |      | GD90 |     | GD120 |      | GD150 |      | GD45 |      | GD90 |      | GD120 |      | GD150 |     |                                  |                     |
|                             | Mean | SD   | Mean | SD  | Mean  | SD   | Mean  | SD   | Mean | SD   | Mean | SD   | Mean  | SD   | Mean  | SD  |                                  |                     |
| 2-Hydroxybutyrate           | 8    | 7    | 7    | 5   | 11    | 12   | 8     | 6    | 25   | 31   | 8    | 8    | 10    | 10   | 17    | 14  | 0.087                            |                     |
| 2-Hydroxyisobutyrate        | 36   | 38   | 22   | 15  | 23    | 20   | 14    | 7    | 44   | 37   | 19   | 14   | 28    | 34   | 11    | 10  | 0.75                             |                     |
| 2-Hydroxyisovalerate        | 5    | 5    | 3    | 2   | 3     | 3    | 3     | 1    | 8    | 6    | 3    | 3    | 4     | 3    | 3     | 2   | 0.25                             |                     |
| 2-Oxoglutarate              | 62   | 51   | 41   | 32  | 46    | 26   | 43    | 5    | 223  | 180  | 102  | 99   | 78    | 65   | 49    | 48  | 0.12                             |                     |
| 2-Oxoisocaproate            | 33   | 39   | 15   | 10  | 17    | 14   | 12    | 7    | 25   | 19   | 13   | 14   | 13    | 10   | 11    | 10  | 0.87                             |                     |
| 3-Hydroxy-3-methylglutarate | 28   | 27   | 20   | 15  | 41    | 50   | 17    | 16   | 27   | 18   | 18   | 16   | 24    | 23   | 19    | 15  | 0.47                             |                     |
| 3-Hydroxybutyrate           | 22   | 11   | 43   | 26  | 51    | 59   | 45    | 58   | 825  | 2019 | 134  | 281  | 139   | 242  | 97    | 191 | 0.16                             |                     |
| 3-Hydroxyisobutyrate        | 64   | 45   | 55   | 46  | 63    | 31   | 57    | 37   | 143  | 139  | 67   | 79   | 87    | 95   | 60    | 43  | 0.34                             |                     |
| 3-Hydroxyisovalerate        | 85   | 108  | 63   | 38  | 71    | 64   | 53    | 45   | 89   | 62   | 58   | 53   | 93    | 137  | 71    | 53  | 0.22                             |                     |
| 3-Indoxylsulfate            | 237  | 235  | 175  | 171 | 327   | 407  | 131   | 90   | 320  | 239  | 210  | 192  | 242   | 205  | 195   | 186 | 0.16                             |                     |
| 3-Methyl-2-oxovalerate      | 7    | 6    | 5    | 5   | 8     | 6    | 7     | 6    | 25   | 30   | 12   | 22   | 15    | 20   | 7     | 7   | 0.24                             |                     |
| 4-Hydroxyphenylacetate      | 81   | 76   | 56   | 31  | 122   | 126  | 43    | 9    | 135  | 132  | 68   | 58   | 112   | 156  | 67    | 34  | 0.33                             |                     |
| 4-Hydroxyphenyllactate      | 23   | 20   | 17   | 10  | 30    | 27   | 22    | 13   | 34   | 22   | 13   | 11   | 20    | 10   | 25    | 21  | 0.47                             |                     |
| Acetamide                   | 27   | 33   | 14   | 12  | 41    | 65   | 9     | 4    | 13   | 6    | 10   | 9    | 9     | 6    | 11    | 8   | 0.70                             |                     |
| Acetate                     | 116  | 51   | 88   | 96  | 176   | 134  | 165   | 153  | 132  | 104  | 547  | 776  | 102   | 70   | 332   | 350 | 0.32                             |                     |
| Acetoacetate                | 29   | 31   | 64   | 50  | 84    | 87   | 331   | 597  | 725  | 1753 | 1297 | 2250 | 54    | 77   | 253   | 444 | 0.41                             |                     |
| Acetone                     | 9    | 3    | 13   | 12  | 7     | 5    | 8     | 5    | 37   | 67   | 14   | 16   | 21    | 40   | 15    | 28  | 0.55                             |                     |
| Alanine                     | 21   | 17   | 26   | 27  | 28    | 19   | 25    | 13   | 41   | 29   | 18   | 19   | 21    | 12   | 43    | 64  | 0.53                             |                     |
| Allantoin                   | 2056 | 1953 | 1488 | 980 | 1816  | 2222 | 1282  | 1003 | 1854 | 1420 | 946  | 852  | 1787  | 1475 | 1112  | 815 | 0.68                             |                     |
| Arginine                    | 131  | 136  | 69   | 58  | 95    | 99   | 70    | 73   | 190  | 155  | 54   | 42   | 80    | 61   | 57    | 43  | 0.42                             |                     |

|                  |      |      |      |      |      |      |      |      |      |       |      |      |      |      |      |      |                   |                  |
|------------------|------|------|------|------|------|------|------|------|------|-------|------|------|------|------|------|------|-------------------|------------------|
| Asparagine       | 25   | 36   | 44   | 43   | 12   | 7    | 11   | 3    | 17   | 9     | 16   | 10   | 18   | 9    | 11   | 8    | 0.85              |                  |
| Betaine          | 66   | 52   | 82   | 66   | 118  | 97   | 123  | 129  | 97   | 61    | 155  | 130  | 282  | 268  | 701  | 1236 | 0.029<br>(0.054)  | 0.32<br>(medium) |
| Butyrate         | 20   | 20   | 17   | 4    | 18   | 16   | 16   | 9    | 43   | 34    | 18   | 12   | 27   | 28   | 40   | 43   | 0.085             |                  |
| Carnitine        | 223  | 229  | 21   | 29   | 6    | 7    | 3    | 3    | 266  | 352   | 17   | 18   | 14   | 19   | 5    | 4    | 0.32              |                  |
| Citrate          | 319  | 447  | 217  | 202  | 280  | 264  | 76   | 63   | 1139 | 992   | 542  | 449  | 459  | 338  | 500  | 704  | <0.010<br>(0.012) | 0.58 (large)     |
| Creatine         | 466  | 311  | 219  | 241  | 334  | 214  | 239  | 299  | 260  | 269   | 556  | 575  | 586  | 478  | 861  | 812  | 0.13              |                  |
| Creatinine       | 5947 | 5861 | 3903 | 2739 | 6939 | 8578 | 3856 | 2904 | 7724 | 5594  | 3652 | 3129 | 5246 | 4563 | 4068 | 2499 | 0.26              |                  |
| Dimethyl-sulfone | 29   | 15   | 42   | 25   | 55   | 60   | 53   | 36   | 66   | 29    | 59   | 57   | 56   | 28   | 87   | 76   | 0.017             |                  |
| Dimethylamine    | 130  | 129  | 104  | 81   | 162  | 197  | 91   | 65   | 170  | 123   | 91   | 70   | 150  | 149  | 121  | 69   | 0.15              |                  |
| Ethanol          | 19   | 24   | 17   | 14   | 31   | 16   | 22   | 20   | 35   | 25    | 23   | 12   | 60   | 117  | 56   | 51   | 0.15              |                  |
| Formate          | 193  | 176  | 124  | 69   | 210  | 190  | 96   | 33   | 368  | 301   | 218  | 198  | 224  | 160  | 370  | 474  | 0.043             |                  |
| Fumarate         | 6    | 4    | 8    | 10   | 7    | 5    | 9    | 7    | 17   | 34    | 13   | 13   | 12   | 17   | 6    | 4    | 0.51              |                  |
| Glucose          | 135  | 188  | 51   | 30   | 61   | 37   | 48   | 39   | 5876 | 15304 | 26   | 16   | 93   | 111  | 45   | 36   | 0.52              |                  |
| Glucuronate      | 614  | 916  | 519  | 424  | 658  | 964  | 351  | 306  | 301  | 161   | 265  | 238  | 369  | 268  | 286  | 248  | 0.95              |                  |
| Glutamate        | 139  | 142  | 72   | 45   | 110  | 105  | 62   | 39   | 123  | 73    | 72   | 55   | 87   | 63   | 77   | 49   | 0.35              |                  |
| Glutamine        | 96   | 101  | 77   | 69   | 107  | 112  | 66   | 25   | 239  | 209   | 92   | 65   | 87   | 52   | 225  | 363  | 0.031             |                  |
| Glycerol         | 492  | 421  | 239  | 35   | 297  | 142  | 237  | 53   | 346  | 71    | 253  | 100  | 372  | 104  | 309  | 96   | 0.37              |                  |
| Glycine          | 62   | 59   | 37   | 17   | 97   | 174  | 40   | 29   | 113  | 97    | 35   | 27   | 59   | 57   | 120  | 195  | 0.10              |                  |
| Guanidoacetate   | 106  | 108  | 70   | 60   | 106  | 90   | 79   | 48   | 191  | 209   | 114  | 114  | 169  | 123  | 216  | 248  | 0.054             |                  |
| Hippurate        | 1512 | 1263 | 1146 | 916  | 1862 | 1648 | 1320 | 920  | 1869 | 918   | 1581 | 1783 | 1231 | 811  | 1719 | 1329 | 0.40              |                  |
| Histidine        | 42   | 64   | 10   | 6    | 28   | 35   | 24   | 16   | 15   | 16    | 18   | 19   | 13   | 12   | 19   | 15   | 0.63              |                  |
| Hypoxanthine     | 341  | 373  | 145  | 104  | 306  | 399  | 193  | 168  | 463  | 439   | 100  | 84   | 226  | 215  | 151  | 126  | 0.61              |                  |
| Inosine          | 23   | 23   | 15   | 8    | 25   | 29   | 19   | 15   | 28   | 20    | 10   | 6    | 18   | 14   | 13   | 8    | 0.84              |                  |
| Isoleucine       | 11   | 10   | 6    | 3    | 7    | 6    | 5    | 3    | 16   | 13    | 6    | 6    | 9    | 6    | 12   | 18   | 0.15              |                  |
| Lactate          | 398  | 629  | 2244 | 4438 | 840  | 996  | 1465 | 2598 | 1106 | 1635  | 94   | 104  | 2985 | 7493 | 236  | 209  | 0.89              |                  |
| Leucine          | 8    | 7    | 10   | 9    | 9    | 7    | 10   | 7    | 10   | 5     | 10   | 17   | 6    | 3    | 17   | 32   | 0.97              |                  |
| Lysine           | 39   | 55   | 29   | 19   | 32   | 29   | 19   | 7    | 102  | 180   | 61   | 112  | 52   | 54   | 72   | 85   | 0.14              |                  |
| Methionine       | 6    | 4    | 28   | 45   | 11   | 11   | 6    | 2    | 11   | 6     | 14   | 11   | 7    | 11   | 16   | 24   | 0.64              |                  |

|                                   |        |        |        |       |        |       |       |       |        |        |       |       |        |       |        |       |                  |                  |
|-----------------------------------|--------|--------|--------|-------|--------|-------|-------|-------|--------|--------|-------|-------|--------|-------|--------|-------|------------------|------------------|
| myo-Inositol                      | 81     | 96     | 27     | 14    | 63     | 65    | 29    | 19    | 98     | 85     | 31    | 18    | 48     | 55    | 45     | 33    | 0.34             |                  |
| N,N-Dimethylglycine               | 8      | 6      | 12     | 13    | 15     | 9     | 16    | 17    | 14     | 8      | 18    | 15    | 18     | 9     | 34     | 30    | 0.054<br>(0.054) | 0.26<br>(medium) |
| N-Carbamoyl-beta-alanine          | 71     | 67     | 46     | 32    | 110    | 169   | 53    | 36    | 76     | 55     | 54    | 57    | 57     | 55    | 67     | 52    | 0.34             |                  |
| N-Methyl-2-pyridone-5-carboxamide | 73     | 73     | 57     | 48    | 72     | 93    | 39    | 32    | 56     | 33     | 32    | 29    | 56     | 43    | 49     | 32    | 0.57             |                  |
| O-Acetylcarnitine                 | 104    | 185    | 7      | 7     | 18     | 24    | 62    | 110   | 58     | 88     | 234   | 439   | 11     | 11    | 23     | 29    | 0.35             |                  |
| Pantothenate                      | 41     | 41     | 27     | 18    | 48     | 60    | 31    | 26    | 37     | 25     | 23    | 19    | 31     | 24    | 30     | 21    | 0.43             |                  |
| Phenylacetate                     | 40     | 42     | 39     | 34    | 82     | 126   | 47    | 36    | 40     | 41     | 30    | 19    | 45     | 34    | 26     | 8     | 0.82             |                  |
| Phenylalanine                     | 31     | 27     | 25     | 22    | 51     | 63    | 24    | 20    | 44     | 34     | 16    | 17    | 30     | 38    | 28     | 26    | 0.65             |                  |
| Proline                           | 109    | 126    | 127    | 116   | 136    | 165   | 87    | 92    | 97     | 49     | 59    | 29    | 73     | 33    | 91     | 93    | 0.56             |                  |
| Propylene-glycol                  | 30     | 26     | 466    | 818   | 374    | 461   | 117   | 88    | 96     | 196    | 38    | 25    | 170    | 296   | 42     | 29    | 0.21             |                  |
| Pyruvate                          | 15     | 13     | 48     | 83    | 25     | 21    | 53    | 70    | 40     | 66     | 11    | 5     | 94     | 207   | 13     | 5     | 0.99             |                  |
| Quinolate                         | 48     | 35     | 73     | 54    | 71     | 80    | 64    | 49    | 52     | 27     | 54    | 47    | 86     | 80    | 54     | 52    | 0.57             |                  |
| Serine                            | 43     | 51     | 29     | 19    | 54     | 51    | 34    | 22    | 80     | 71     | 37    | 36    | 36     | 29    | 68     | 76    | 0.35             |                  |
| Succinate                         | 30     | 32     | 13     | 8     | 20     | 17    | 9     | 4     | 67     | 60     | 33    | 44    | 31     | 40    | 44     | 65    | 0.061            |                  |
| tau-Methylhistidine               | 60     | 62     | 24     | 17    | 62     | 93    | 40    | 56    | 42     | 59     | 20    | 17    | 33     | 28    | 34     | 40    | 0.93             |                  |
| Taurine                           | 3154   | 3016   | 1421   | 1178  | 1824   | 2040  | 1061  | 1405  | 2485   | 2174   | 846   | 1096  | 1224   | 993   | 1069   | 739   | 0.73             |                  |
| Threonine                         | 83     | 74     | 42     | 24    | 58     | 41    | 34    | 6     | 160    | 171    | 51    | 30    | 62     | 39    | 185    | 321   | 0.13             |                  |
| Tiglylglycine                     | 80     | 85     | 37     | 20    | 55     | 63    | 23    | 13    | 59     | 42     | 28    | 22    | 34     | 38    | 20     | 13    | 0.89             |                  |
| Trimethylamine                    | 3      | 3      | 2      | 1     | 6      | 9     | 1     | 1     | 4      | 4      | 3     | 3     | 3      | 3     | 4      | 2     | 0.12             |                  |
| Trimethylamine-N-oxide            | 98     | 90     | 168    | 130   | 201    | 209   | 101   | 41    | 231    | 173    | 178   | 173   | 193    | 230   | 200    | 197   | 0.25             |                  |
| Tyrosine                          | 62     | 57     | 51     | 52    | 45     | 35    | 58    | 60    | 73     | 50     | 72    | 78    | 58     | 53    | 91     | 93    | 0.11             |                  |
| Urea                              | 123624 | 112638 | 102675 | 69146 | 129995 | 98154 | 84534 | 48247 | 141327 | 107250 | 85588 | 97877 | 103717 | 73062 | 118104 | 80359 | 0.59             |                  |
| Valine                            | 11     | 10     | 9      | 7     | 9      | 8     | 7     | 5     | 15     | 11     | 7     | 7     | 9      | 6     | 15     | 24    | 0.59             |                  |

**Supplementary Table S6.** Mean concentrations of metabolites in placenta (nmol/g). FDR correction was applied on p-values of metabolites involved in one-carbon metabolism pathway. Concentrations are expressed as mean and standard deviation (SD). Effect size was calculated for metabolites with FDR corrected  $p < 0.1$ .

|                        | LC   |     | OC   |     | p-value<br>(adjusted p-value) | Effect size (Cohen's D) |
|------------------------|------|-----|------|-----|-------------------------------|-------------------------|
|                        | Mean | SD  | Mean | SD  |                               |                         |
| 3-Hydroxyisovalerate   | 10   | 9   | 18   | 2   | 0.29                          |                         |
| Acetate                | 927  | 267 | 1024 | 23  | 0.65                          |                         |
| Alanine                | 86   | 23  | 122  | 41  | 0.06                          | 1.76 (very large)       |
| Arginine               | 62   | 18  | 72   | 7   | 0.67                          |                         |
| Aspartate              | 219  | 69  | 246  | 75  | 0.72                          |                         |
| Betaine                | 195  | 47  | 117  | 64  | 0.038 (0.054)                 | 1.93 (very large)       |
| Choline                | 21   | 2   | 15   | 6   | 0.041(0.054)                  | 1.95 (very large)       |
| Creatine               | 57   | 5   | 64   | 20  | 0.85                          |                         |
| Formate                | 842  | 116 | 860  | 86  | 0.67                          |                         |
| GTP                    | 35   | 6   | 34   | 25  | 0.46                          |                         |
| Glucose                | 567  | 304 | 725  | 514 | 0.99                          |                         |
| Glutamate              | 410  | 75  | 388  | 43  | 0.049                         | 1.76 (very large)       |
| Glutamine              | 192  | 9   | 184  | 32  | 0.30                          |                         |
| Glutathione            | 843  | 55  | 775  | 83  | 0.054 (0.054)                 | 1.96 (very large)       |
| Glycerol               | 179  | 13  | 197  | 38  | 0.31                          |                         |
| Glycine                | 141  | 45  | 135  | 25  | 0.44                          |                         |
| Guanidoacetate         | 72   | 32  | 87   | 10  | 0.33                          |                         |
| Isoleucine             | 5    | 9   | 15   | 12  | 0.76                          |                         |
| Lactate                | 762  | 819 | 1223 | 791 | 0.16                          |                         |
| Leucine                | 16   | 7   | 23   | 18  | 0.79                          |                         |
| Lysine                 | 181  | 16  | 186  | 27  | 0.81                          |                         |
| Malonate               | 131  | 36  | 108  | 8   | 0.0027                        | 7.17 (very large)       |
| NAD                    | 25   | 26  | 41   | 23  | 0.54                          |                         |
| O-Phosphocholine       | 44   | 12  | 30   | 9   | 0.19                          |                         |
| O-Phosphoethanolamine  | 68   | 13  | 61   | 13  | 0.66                          |                         |
| Propylene-glycol       | 66   | 42  | 311  | 400 | 0.67                          |                         |
| Pyruvate               | 44   | 41  | 67   | 38  | 0.086                         | 1.43 (very large)       |
| Serine                 | 75   | 32  | 61   | 15  | 0.99                          |                         |
| Taurine                | 298  | 128 | 388  | 143 | 0.93                          |                         |
| Threonine              | 41   | 10  | 39   | 8   | 0.96                          |                         |
| Trimethylamine-N-oxide | 224  | 157 | 134  | 65  | 0.93                          |                         |
| UDP-glucose            | 38   | 7   | 57   | 28  | 0.37                          |                         |
| Valine                 | 38   | 13  | 56   | 33  | 0.85                          |                         |



**Supplementary Table S7.** Metabolic status of the two Obese mothers who showed high HOMA-IR and large birthweight of infants in Figure 4b. Data values that correspond to the following categories are expressed as bold in the table: Hyperglycemia (fasting glucose > 100 mg/dL); hyperinsulinemia (fasting insulin > 100  $\mu$ U/mL); triglyceride level that is indicative of metabolic syndrome (fasting triglyceride > 79.7 mg/dL). The asterisks represent samples that were removed due to technical errors.

| Mother ID | Fasting glucose (mg/dL) |      |       |       | Fasting insulin ( $\mu$ U/mL) |      |       |       | Triglyceride (mg/dL) |      |       |       |
|-----------|-------------------------|------|-------|-------|-------------------------------|------|-------|-------|----------------------|------|-------|-------|
|           | GD45                    | GD90 | GD120 | GD150 | GD45                          | GD90 | GD120 | GD150 | GD45                 | GD90 | GD120 | GD150 |
| 1215218   | 70                      | 57   | 104   | 62    | 261                           | *    | *     | 480   | 38                   | 100  | 127   | 87    |
| 1214217   | 147                     | 60   | 60    | 64    | 2                             | 509  | 720   | 840   | 127                  | 122  | 111   | 228   |

**Supplementary Table S8.** Mean concentrations of metabolites in infant plasma (μM). FDR correction was applied on p-values of metabolites involved in TCA cycle. Concentrations are expressed as mean and standard deviation (SD). Since none of the metabolites had adjusted p-values < 0.05, effect size was not calculated.

|                      | LC   |     |      |      |       |     |       |     | OC   |      |      |      |       |      |       |      | p-value<br>(adjusted<br>p-value) |
|----------------------|------|-----|------|------|-------|-----|-------|-----|------|------|------|------|-------|------|-------|------|----------------------------------|
|                      | PD30 |     | PD90 |      | PD110 |     | PD180 |     | PD30 |      | PD90 |      | PD110 |      | PD180 |      |                                  |
|                      | Mean | SD  | Mean | SD   | Mean  | SD  | Mean  | SD  | Mean | SD   | Mean | SD   | Mean  | SD   | Mean  | SD   |                                  |
| 2-Hydroxybutyrate    | 21   | 2   | 21   | 3    | 12    | 3   | 21    | 8   | 19   | 4    | 19   | 5    | 11    | 6    | 31    | 28   | 0.69                             |
| 2-Hydroxyisovalerate | 4    | 1   | 3    | 1    | 3     | 1   | 3     | 1   | 5    | 1    | 4    | 1    | 4     | 1    | 4     | 2    | 0.097                            |
| 2-Oxoglutarate       | 40   | 6   | 28   | 7    | 26    | 6   | 16    | 3   | 45   | 10   | 35   | 9    | 32    | 10   | 20    | 5    | 0.044 (0.19)                     |
| 2-Oxoisocaproate     | 6    | 2   | 6    | 1    | 4     | 0   | 8     | 3   | 7    | 2    | 6    | 2    | 4     | 1    | 9     | 2    | 0.48                             |
| 3-Hydroxybutyrate    | 380  | 316 | 270  | 184  | 78    | 53  | 414   | 300 | 242  | 217  | 180  | 201  | 160   | 247  | 732   | 1023 | 0.62                             |
| 3-Hydroxyisobutyrate | 23   | 5   | 18   | 3    | 13    | 3   | 24    | 11  | 21   | 6    | 18   | 5    | 12    | 3    | 21    | 9    | 0.43                             |
| 3-Methylhistidine    | 48   | 10  | 35   | 7    | 34    | 10  | 29    | 8   | 48   | 9    | 33   | 9    | 31    | 8    | 27    | 9    | 0.56                             |
| Acetate              | 59   | 32  | 71   | 18   | 74    | 31  | 87    | 39  | 47   | 10   | 60   | 22   | 64    | 32   | 100   | 67   | 0.42                             |
| Acetoacetate         | 153  | 117 | 128  | 72   | 45    | 23  | 248   | 151 | 118  | 99   | 82   | 75   | 88    | 128  | 316   | 356  | 0.59                             |
| Acetone              | 33   | 19  | 24   | 12   | 14    | 3   | 44    | 28  | 33   | 37   | 23   | 15   | 20    | 16   | 67    | 95   | 0.92                             |
| Alanine              | 321  | 74  | 329  | 42   | 348   | 82  | 215   | 24  | 317  | 54   | 383  | 42   | 335   | 67   | 214   | 80   | 0.87                             |
| Arginine             | 73   | 31  | 71   | 16   | 68    | 23  | 65    | 16  | 72   | 29   | 76   | 16   | 73    | 14   | 68    | 22   | 0.57                             |
| Asparagine           | 43   | 14  | 48   | 13   | 59    | 14  | 44    | 15  | 42   | 12   | 50   | 12   | 48    | 17   | 42    | 15   | 0.47                             |
| Betaine              | 66   | 27  | 49   | 18   | 51    | 17  | 61    | 33  | 92   | 60   | 65   | 28   | 58    | 21   | 52    | 17   | 0.53                             |
| Butyrate             | 5    | 1   | 5    | 1    | 4     | 1   | 7     | 2   | 6    | 1    | 5    | 1    | 4     | 2    | 7     | 2    | 0.72                             |
| Carnitine            | 32   | 10  | 32   | 11   | 26    | 4   | 23    | 13  | 32   | 19   | 29   | 8    | 20    | 5    | 23    | 11   | 0.41                             |
| Creatine             | 40   | 13  | 59   | 32   | 44    | 23  | 56    | 34  | 33   | 14   | 71   | 37   | 44    | 14   | 60    | 29   | 0.88                             |
| Creatinine           | 33   | 5   | 32   | 4    | 33    | 6   | 33    | 2   | 35   | 7    | 33   | 6    | 32    | 4    | 33    | 6    | 0.93                             |
| Ethanol              | 90   | 38  | 54   | 46   | 76    | 89  | 85    | 101 | 115  | 118  | 93   | 134  | 71    | 68   | 144   | 150  | 0.62                             |
| Formate              | 227  | 125 | 224  | 106  | 174   | 105 | 175   | 94  | 194  | 38   | 165  | 71   | 192   | 93   | 157   | 73   | 0.54                             |
| Fumarate             | 9    | 2   | 7    | 2    | 4     | 1   | 2     | 1   | 9    | 2    | 9    | 4    | 5     | 4    | 3     | 1    | 0.31                             |
| Glucose              | 5988 | 516 | 7610 | 1792 | 5703  | 809 | 4357  | 374 | 5376 | 1087 | 8183 | 1803 | 5198  | 1075 | 4175  | 996  | 0.41                             |

|                           |      |      |      |      |      |      |      |     |      |      |      |      |      |      |      |      |              |
|---------------------------|------|------|------|------|------|------|------|-----|------|------|------|------|------|------|------|------|--------------|
| Glutamate                 | 50   | 15   | 57   | 17   | 53   | 16   | 49   | 22  | 61   | 17   | 65   | 20   | 50   | 21   | 40   | 18   | 0.98 (0.99)  |
| Glutamine                 | 493  | 58   | 433  | 55   | 467  | 78   | 471  | 64  | 488  | 43   | 469  | 49   | 446  | 48   | 452  | 76   | 0.96         |
| Glycerol                  | 951  | 143  | 778  | 107  | 833  | 115  | 627  | 186 | 1074 | 229  | 816  | 251  | 794  | 253  | 634  | 159  | 0.87         |
| Glycine                   | 355  | 42   | 355  | 56   | 374  | 65   | 405  | 61  | 335  | 27   | 365  | 33   | 350  | 54   | 384  | 79   | 0.52         |
| Histidine                 | 86   | 15   | 78   | 16   | 94   | 22   | 66   | 20  | 79   | 16   | 76   | 15   | 75   | 11   | 56   | 12   | 0.064 (0.19) |
| Isoleucine                | 50   | 21   | 55   | 12   | 45   | 9    | 78   | 36  | 56   | 13   | 59   | 8    | 51   | 18   | 76   | 28   | 0.37         |
| Lactate                   | 6416 | 1227 | 7441 | 1668 | 7285 | 1963 | 1383 | 423 | 7080 | 2764 | 9547 | 4819 | 6536 | 2291 | 2203 | 1963 | 0.60         |
| Leucine                   | 57   | 27   | 68   | 16   | 56   | 15   | 96   | 41  | 63   | 16   | 70   | 8    | 57   | 22   | 91   | 33   | 0.61         |
| Lysine                    | 103  | 34   | 104  | 21   | 103  | 25   | 115  | 33  | 101  | 26   | 114  | 25   | 101  | 25   | 124  | 47   | 0.81 (0.99)  |
| Methionine                | 39   | 17   | 21   | 4    | 19   | 4    | 21   | 9   | 40   | 18   | 24   | 8    | 23   | 8    | 21   | 6    | 0.66         |
| myo-Inositol              | 104  | 11   | 85   | 11   | 68   | 12   | 42   | 8   | 102  | 15   | 85   | 18   | 62   | 21   | 47   | 10   | 0.86         |
| Phenylalanine             | 46   | 13   | 42   | 7    | 46   | 7    | 42   | 13  | 47   | 4    | 44   | 4    | 52   | 15   | 41   | 6    | 0.35         |
| Proline                   | 251  | 49   | 215  | 50   | 210  | 66   | 201  | 48  | 248  | 24   | 239  | 28   | 202  | 51   | 185  | 61   | 0.99 (0.99)  |
| Pyruvate                  | 278  | 48   | 282  | 49   | 258  | 25   | 71   | 23  | 299  | 101  | 297  | 81   | 276  | 98   | 127  | 121  | 0.56         |
| Serine                    | 111  | 19   | 124  | 18   | 126  | 19   | 132  | 19  | 113  | 21   | 131  | 27   | 124  | 28   | 118  | 30   | 0.77         |
| Succinate                 | 23   | 6    | 24   | 10   | 17   | 5    | 7    | 2   | 22   | 8    | 34   | 27   | 13   | 5    | 8    | 2    | 0.82 (0.99)  |
| Taurine                   | 96   | 34   | 86   | 16   | 69   | 11   | 51   | 27  | 98   | 47   | 114  | 48   | 81   | 18   | 59   | 28   | 0.42         |
| Threonine                 | 106  | 41   | 79   | 23   | 78   | 17   | 77   | 14  | 87   | 15   | 78   | 18   | 72   | 15   | 73   | 15   | 0.41         |
| trans-4-Hydroxy-L-proline | 74   | 14   | 45   | 8    | 48   | 17   | 37   | 7   | 62   | 17   | 45   | 6    | 42   | 6    | 30   | 7    | 0.073        |
| Tyrosine                  | 98   | 31   | 70   | 12   | 56   | 14   | 57   | 11  | 94   | 23   | 84   | 20   | 65   | 13   | 59   | 11   | 0.37         |
| Urea                      | 1640 | 354  | 1870 | 449  | 1865 | 558  | 2871 | 955 | 1607 | 549  | 1725 | 459  | 1645 | 410  | 2290 | 520  | 0.41         |
| Uridine                   | 4    | 1    | 5    | 1    | 5    | 3    | 7    | 1   | 4    | 3    | 6    | 2    | 5    | 3    | 7    | 2    | 0.85         |
| Valine                    | 119  | 42   | 136  | 29   | 125  | 28   | 187  | 71  | 130  | 26   | 145  | 20   | 128  | 26   | 186  | 57   | 0.50         |

**Supplementary Table S9.** Mean concentrations of metabolites in infant urine ( $\mu\text{M}$ ). Since none of the raw p-values was below 0.1, FDR correction and effect size were not calculated. Concentrations are expressed as mean and standard deviation (SD).

|                             | LC   |      | OC   |      | p-value |
|-----------------------------|------|------|------|------|---------|
|                             | Mean | SD   | Mean | SD   |         |
| 2-Hydroxybutyrate           | 5    | 3    | 24   | 34   | 0.10    |
| 2-Hydroxyisobutyrate        | 14   | 8    | 26   | 19   | 0.32    |
| 2-Hydroxyisovalerate        | 2    | 1    | 3    | 2    | 0.25    |
| 2-Oxoglutarate              | 27   | 15   | 67   | 101  | 0.49    |
| 2-Oxoisocaproate            | 13   | 7    | 12   | 8    | 0.94    |
| 3-Hydroxy-3-methylglutarate | 14   | 9    | 18   | 11   | 0.61    |
| 3-Hydroxybutyrate           | 74   | 125  | 2045 | 5249 | 0.49    |
| 3-Hydroxyisobutyrate        | 26   | 18   | 69   | 96   | 0.41    |
| 3-Hydroxyisovalerate        | 18   | 21   | 27   | 30   | 0.68    |
| 3-Indoxylsulfate            | 69   | 26   | 95   | 48   | 0.32    |
| 4-Hydroxyphenylacetate      | 56   | 57   | 72   | 77   | 0.64    |
| 4-Hydroxyphenyllactate      | 11   | 6    | 18   | 17   | 0.31    |
| Acetamide                   | 13   | 5    | 22   | 21   | 0.42    |
| Acetate                     | 53   | 60   | 130  | 182  | 0.82    |
| Acetoacetate                | 2043 | 3657 | 1238 | 2261 | 0.82    |
| Acetone                     | 43   | 44   | 82   | 150  | 0.91    |
| Alanine                     | 11   | 4    | 22   | 27   | 0.53    |
| Allantoin                   | 809  | 241  | 1437 | 1145 | 0.29    |
| Arginine                    | 31   | 11   | 53   | 47   | 0.31    |
| Asparagine                  | 14   | 6    | 23   | 25   | 0.78    |
| Betaine                     | 17   | 11   | 57   | 82   | 0.36    |
| Butyrate                    | 18   | 20   | 24   | 23   | 0.76    |
| Carnitine                   | 24   | 32   | 11   | 17   | 0.63    |
| Citrate                     | 20   | 20   | 30   | 25   | 0.59    |
| Creatine                    | 307  | 525  | 424  | 549  | 0.52    |
| Creatinine                  | 1569 | 565  | 3199 | 3771 | 0.27    |
| Dimethyl-sulfone            | 43   | 31   | 42   | 34   | 0.84    |
| Dimethylamine               | 95   | 49   | 167  | 178  | 0.46    |
| Formate                     | 125  | 100  | 241  | 333  | 0.95    |
| Fucose                      | 12   | 3    | 26   | 21   | 0.11    |
| Fumarate                    | 3    | 4    | 6    | 8    | 0.66    |
| Galactonate                 | 227  | 76   | 497  | 573  | 0.35    |
| Galactose                   | 137  | 210  | 200  | 281  | 0.56    |
| Glucose                     | 45   | 29   | 70   | 74   | 0.53    |
| Glucuronate                 | 212  | 41   | 304  | 274  | 0.75    |
| Glutamate                   | 59   | 36   | 80   | 52   | 0.47    |
| Glutamine                   | 42   | 27   | 124  | 171  | 0.18    |
| Glycerol                    | 421  | 29   | 461  | 53   | 0.12    |
| Glycine                     | 27   | 8    | 73   | 101  | 0.31    |
| Glycolate                   | 167  | 81   | 443  | 523  | 0.16    |

|                                   |       |       |       |       |      |
|-----------------------------------|-------|-------|-------|-------|------|
| Guanidoacetate                    | 21    | 9     | 38    | 41    | 0.50 |
| Hippurate                         | 570   | 365   | 1111  | 1222  | 0.48 |
| Homovanillate                     | 12    | 5     | 26    | 29    | 0.20 |
| Hypoxanthine                      | 120   | 52    | 201   | 175   | 0.56 |
| Inosine                           | 11    | 3     | 13    | 6     | 0.47 |
| Isoleucine                        | 4     | 2     | 7     | 8     | 0.85 |
| Isopropanol                       | 2     | 2     | 6     | 7     | 0.36 |
| Lactate                           | 108   | 148   | 218   | 465   | 0.96 |
| Leucine                           | 3     | 2     | 5     | 6     | 0.73 |
| Lysine                            | 35    | 32    | 37    | 36    | 0.74 |
| myo-Inositol                      | 29    | 14    | 39    | 18    | 0.28 |
| N,N-Dimethylglycine               | 7     | 5     | 27    | 41    | 0.71 |
| N-Carbamoyl-beta-alanine          | 54    | 40    | 74    | 64    | 0.69 |
| N-Methyl-2-pyridone-5-carboxamide | 19    | 14    | 24    | 17    | 0.79 |
| O-Acetylcarnitine                 | 58    | 83    | 80    | 110   | 0.25 |
| Pantothenate                      | 26    | 10    | 46    | 35    | 0.90 |
| Phenylacetate                     | 35    | 27    | 32    | 22    | 0.58 |
| Phenylacetyl L-Glutamine          | 1261  | 659   | 1214  | 1178  | 0.25 |
| Proline                           | 33    | 11    | 72    | 75    | 0.43 |
| Propylene-glycol                  | 5     | 3     | 14    | 18    | 0.49 |
| Pyruvate                          | 141   | 285   | 18    | 15    | 0.39 |
| Quinolate                         | 34    | 15    | 49    | 29    | 0.18 |
| Succinate                         | 4     | 2     | 22    | 38    | 0.69 |
| Taurine                           | 789   | 285   | 1054  | 780   | 0.32 |
| Threonine                         | 23    | 15    | 47    | 60    | 0.96 |
| Tiglylglycine                     | 20    | 8     | 27    | 22    | 0.34 |
| Trimethylamine                    | 2     | 2     | 3     | 2     | 0.83 |
| Trimethylamine-N-oxide            | 92    | 48    | 116   | 106   | 0.70 |
| Tyrosine                          | 15    | 7     | 20    | 14    | 0.98 |
| Urea                              | 62351 | 34140 | 68609 | 45393 | 0.38 |
| Valine                            | 5     | 4     | 8     | 7     | 0.35 |
